# Supplementary material
Source: PubMed Central journal article supplement (PMC4254188)
Supplement: NIHMS616826-supplement-01.pdf [file NIHMS616826-supplement-01.pdf]

**Appendix:** Maternal Obesity and Gestational Diabetes are Associated with Placental Leptin DNA Methylation

|                                                                                                                                                                                                                                                                                                                                                                                                                                                                                                                                                                                    |
|------------------------------------------------------------------------------------------------------------------------------------------------------------------------------------------------------------------------------------------------------------------------------------------------------------------------------------------------------------------------------------------------------------------------------------------------------------------------------------------------------------------------------------------------------------------------------------|
| <p><b>Supplementary Table 1:</b> Primers, bisulfite PCR conditions and pyrosequencing assays of the <i>LEP</i> promoter</p>                                                                                                                                                                                                                                                                                                                                                                                                                                                        |
| <p><b>Bisulfite PCR</b></p> <p><i>Forward primer</i><br/> <i>LEP-For</i> 5' - GAGTTTTTGGAGGGATATTAAGGAT-3'</p> <p><i>Reverse Primer</i><br/> <i>LEP-Rev</i> 5'-Biotin-CAAAATTATATAAAACCCTATAACCTACCA-3'</p> <p><i>Amplicon length:</i> 383 bp</p> <p><i>Amplification conditions:</i><br/> Initiation: 15 min. at 94°C<br/> 50 cycles: Denaturation: 1 min at 94°C<br/>           Annealing: 1 min at 56°C<br/>           Extension 1 min at 72°C<br/> Final extension: 10 min at 72°C.</p>                                                                                        |
| <p><b>Pyrosequencing</b> (7:127881127-127881350)</p> <p><i>Forward sequencing primer 1:</i><br/> <i>LEP-S1</i> 5'-GGGAGGTATTTAAGGG-3'<br/> Sequence to Analyze 1: (11 CpGs)<br/> TGYGYGYGTGGTTTTTGGHGYGTYGAGGTTTTTTTTTYGAGGTTTYGYGAGGTGTA<br/> TATTGYBGGTTTAGGGTTAGTAGTYGTTYGGTAYGTYGTTATTTTGAGGGG</p> <p><i>Forward sequencing primer 2:</i><br/> <i>LEP-S2</i> 5' -GGGAGGGGAGGGAGTTGG-3'<br/> Sequence to Analyze 2: (12 CpGs)<br/> YGTTAGAAATGYGTYGGGGTTTTGYGGGGTAGTTGYGTAAGTTGTGATYGGGTYG<br/> TTATAAGWGGGGYGGGTAGGTATGGAGTTTTYGTAGGAATYGTAGYGTARYGGT<br/> TGTAAGGTAAGGTTT</p> |
